# Supplementary material for: Solvent Screening for Solubility Enhancement of Theophylline in Neat, Binary and Ternary NADES Solvents: New Measurements and Ensemble Machine Learning
Source: MDPI journal article supplement (doi:10.3390/ijms22147347), 2021-07-08
Supplement: s1 [file s1]

# Solvent screening for solubility enhancement of Theophylline in neat, binary and ternary NADES solvents: new measurements and ensemble machine learning.

Piotr Cysewski<sup>1,\*</sup>, Patryk Cymerman<sup>1</sup>, Tomasz Jeliński<sup>1</sup> and Maciej Przybyłek<sup>1</sup>

<sup>1</sup> Department of Physical Chemistry, Faculty of Pharmacy, Collegium Medicum of Bydgoszcz, Nicolaus Copernicus University in Toruń, Kurpińskiego 5, 85-950 Bydgoszcz, Poland

\* Correspondence: piotrc@cm.umk.pl

## Supplementary materials

List of figures and tables

**Table S1a.** Concentrations of Theophylline solutions and corresponding mean absorbance and standard deviation values, used during preparation of the calibration curve.

**Table S1b.** Parameters of the obtained calibration curve for Theophylline solubility determination.

**Table S2.** Comparison of Theophylline solubility at 25°C obtained in this study and the results taken from literature.

**Table S3.** Mole fractions ( $\cdot 10^4$ ) and standard deviation values ( $\cdot 10^4$ ) of Theophylline at 25°C in neat organic solvents and water.

**Table S4.** Mole fractions ( $\cdot 10^4$ ) and standard deviation values ( $\cdot 10^4$ ) of Theophylline at 25°C in binary solvents comprising water and an organic solvent in different proportions.

**Table S5.** Mole fractions ( $\cdot 10^4$ ) and standard deviation values ( $\cdot 10^4$ ) of Theophylline at 25°C in pure Natural Deep Eutectic Solvents.

**Table S6.** Mole fractions ( $\cdot 10^4$ ) and standard deviation values ( $\cdot 10^4$ ) of Theophylline at 25°C in mixture containing water and Natural Deep Eutectic Solvents in different proportions.

### Table S7

Characteristics of clusters of developed artificial networks used for Theophylline solubility predictions in neat solvents, binary aqueous mixtures and ternary NADES choline chloride based solvents.

### Figure S1.

The Importance of molecular descriptors in the development of SANNs. Red bold line represents the mean value, while open circles characterize the most efficient network (SANN1).

### Figure S2.

(top) The results of screening of Theophylline solubility in neat solvents using the cluster of 30 neural networks. For comparison purposes the experimental solubility in DMSO was provided. The very first point corresponds to predictions of the most accurate network SANN1.

(bottom) Distributions of hat values.

### Figure S3.

(top) The results of screening of Theophylline solubility in 228 binary solvents mixtures using the cluster of 30 neural networks. For comparison purposes the experimental solubility in 1:1 [DMSO+water] solution was provided. Networks are numbered according to decreasing accuracy (RMSD values). (bottom) Distributions of hat values.

### Figure S4.

(top) The results of screening of Theophylline solubility in aqueous NADES formed by 1050 glycerol replacers in condition mimicking experimental conditions. For comparison purposes the experimental solubility in 0.8:0.2 [ChCl+glycerol]:[water] solution was provided. (bottom) Distributions of hat values.

**Table S1a.** Concentrations of Theophylline solutions and corresponding mean absorbance and standard deviation values, used during preparation of the calibration curve.

| C [mg/ml] | A <sub>mean</sub> | SD    |
|-----------|-------------------|-------|
| 0.01800   | 1.271             | 0.023 |
| 0.01440   | 1.012             | 0.012 |
| 0.01200   | 0.859             | 0.016 |
| 0.01029   | 0.730             | 0.023 |
| 0.00900   | 0.633             | 0.021 |
| 0.00800   | 0.548             | 0.023 |
| 0.00720   | 0.513             | 0.005 |
| 0.00655   | 0.457             | 0.014 |
| 0.00600   | 0.421             | 0.007 |
| 0.00554   | 0.392             | 0.005 |
| 0.00514   | 0.369             | 0.009 |
| 0.00480   | 0.344             | 0.010 |

**Table S1b.** Parameters of the obtained calibration curve for Theophylline solubility determination.

| parameter      | value                       |
|----------------|-----------------------------|
| a              | 70.595                      |
| b              | -1.11·10 <sup>-16</sup>     |
| R <sup>2</sup> | 0.9993                      |
| LOD            | 3.56·10 <sup>-4</sup> mg/ml |
| LOQ            | 1.07·10 <sup>-3</sup> mg/ml |

**Table S2.** Comparison of Theophylline solubility at 25°C obtained in this study and the results taken from literature.

| solvent                    | x <sub>T</sub> [·10 <sup>4</sup> ] |         | relative difference |
|----------------------------|------------------------------------|---------|---------------------|
|                            | literature                         | results |                     |
| water <sup>a</sup>         | 6.20                               | 6.10    | -1.53%              |
| water <sup>b</sup>         | 6.30                               | 6.10    | -3.10%              |
| methanol <sup>a</sup>      | 13.70                              | 13.64   | -0.41%              |
| methanol <sup>b</sup>      | 13.30                              | 13.64   | 2.58%               |
| 1-propanol <sup>a</sup>    | 13.58                              | 13.39   | -1.38%              |
| ethyl acetate <sup>a</sup> | 6.73                               | 6.89    | 2.39%               |
| acetone <sup>a</sup>       | 9.30                               | 9.51    | 2.22%               |

<sup>a</sup>Zhong et al. [95] <sup>b</sup>Cárdenas et al. [96]

**Table S3.** Mole fractions ( $\cdot 10^4$ ) and standard deviation values ( $\cdot 10^4$ ) of Theophylline at 25°C in neat organic solvents and water.

| solvent       | $x_T \cdot 10^4$ | $SD \cdot 10^4$ |
|---------------|------------------|-----------------|
| DMSO          | 70.960           | 0.283           |
| DMF           | 59.210           | 0.431           |
| 1,4-dioxane   | 31.669           | 0.582           |
| acetone       | 9.532            | 0.241           |
| acetonitrile  | 6.779            | 0.130           |
| 1-propanol    | 13.393           | 0.125           |
| 1-butanol     | 10.229           | 0.112           |
| 1-pentanol    | 6.879            | 0.144           |
| 1-octanol     | 7.270            | 0.105           |
| ethyl acetate | 6.891            | 0.060           |
| methanol      | 13.644           | 0.041           |
| water         | 6.103            | 0.123           |

**Table S4.** Mole fractions ( $\cdot 10^4$ ) and standard deviation values ( $\cdot 10^4$ ) of Theophylline at 25°C in binary solvents comprising water and an organic solvent in different proportions.

| $x_{\text{solvent}}$ | DMSO             |                 | DMF              |                 | 1,4-dioxane      |                 | 1-butanol        |                 | 1-propanol       |                 |
|----------------------|------------------|-----------------|------------------|-----------------|------------------|-----------------|------------------|-----------------|------------------|-----------------|
|                      | $x_T \cdot 10^4$ | $SD \cdot 10^4$ |
| 0.00                 | 6.105            | 0.123           | 6.105            | 0.123           | 6.105            | 0.123           | 6.105            | 0.123           | 6.105            | 0.123           |
| 0.03                 | 9.140            | 0.062           | 8.193            | 0.016           | 7.553            | 0.120           | 6.623            | 0.161           | 6.771            | 0.253           |
| 0.07                 | 11.154           | 0.040           | 9.949            | 0.194           | 8.414            | 0.070           | 7.283            | 0.109           | 7.515            | 0.087           |
| 0.10                 | 13.235           | 0.129           | 11.005           | 0.178           | 9.677            | 0.228           | 8.142            | 0.150           | 8.204            | 0.219           |
| 0.13                 | 15.086           | 0.081           | 12.968           | 0.134           | 11.076           | 0.135           | 9.363            | 0.201           | 9.234            | 0.187           |
| 0.17                 | 18.092           | 0.092           | 16.193           | 0.149           | 13.108           | 0.020           | 11.243           | 0.249           | 10.785           | 0.236           |
| 0.20                 | 21.915           | 0.148           | 19.924           | 0.248           | 15.114           | 0.129           | 13.262           | 0.108           | 12.600           | 0.193           |
| 0.32                 | 42.102           | 0.259           | 34.769           | 0.577           | 29.278           | 0.457           | 22.076           | 0.623           | 20.655           | 0.397           |
| 0.50                 | 90.130           | 0.560           | 76.421           | 0.583           | 62.371           | 0.448           | 43.466           | 0.221           | 35.030           | 0.084           |
| 0.68                 | 83.259           | 0.827           | 70.633           | 0.538           | 52.440           | 0.747           | 27.304           | 0.131           | 23.945           | 1.568           |
| 0.80                 | 77.514           | 0.577           | 64.674           | 0.730           | 40.175           | 0.520           | 18.180           | 0.571           | 16.323           | 0.245           |
| 1.00                 | 70.960           | 0.283           | 59.210           | 0.431           | 31.669           | 0.582           | 10.229           | 0.112           | 13.393           | 0.125           |

**Table S5.** Mole fractions ( $\cdot 10^4$ ) and standard deviation values ( $\cdot 10^4$ ) of Theophylline at 25°C in pure Natural Deep Eutectic Solvents.

| NADES constituent | $x_T \cdot 10^4$ | $SD \cdot 10^4$ |
|-------------------|------------------|-----------------|
| glycerol          | 128.174          | 0.682           |
| fructose          | 67.792           | 0.723           |
| glucose           | 73.447           | 0.755           |
| sorbitol          | 103.631          | 1.200           |
| xylitol           | 92.610           | 0.938           |
| saccharose        | 43.155           | 1.011           |
| maltose           | 37.956           | 0.951           |

**Table S6.** Mole fractions ( $\cdot 10^4$ ) and standard deviation values ( $\cdot 10^4$ ) of Theophylline at 25°C in mixture containing water and Natural Deep Eutectic Solvents in different proportions.

| <b>XNADES</b> | <b>ChCl+glycerol</b>               |                                   | <b>ChCl+sorbitol</b>               |                                   | <b>ChCl+xylitol</b>                |                                   | <b>ChCl+glucose</b>                |                                   |
|---------------|------------------------------------|-----------------------------------|------------------------------------|-----------------------------------|------------------------------------|-----------------------------------|------------------------------------|-----------------------------------|
|               | <b><math>x_T \cdot 10^4</math></b> | <b><math>SD \cdot 10^4</math></b> |
| <b>0.00</b>   | 6.105                              | 0.123                             | 6.105                              | 0.123                             | 6.105                              | 0.123                             | 6.105                              | 0.123                             |
| <b>0.03</b>   | 6.454                              | 0.069                             | 6.387                              | 0.012                             | 6.221                              | 0.036                             | 6.413                              | 0.027                             |
| <b>0.07</b>   | 7.145                              | 0.068                             | 6.799                              | 0.066                             | 6.560                              | 0.047                             | 6.852                              | 0.022                             |
| <b>0.10</b>   | 8.021                              | 0.155                             | 7.179                              | 0.054                             | 6.982                              | 0.048                             | 7.603                              | 0.061                             |
| <b>0.13</b>   | 9.116                              | 0.110                             | 7.907                              | 0.121                             | 7.602                              | 0.046                             | 8.663                              | 0.036                             |
| <b>0.17</b>   | 10.894                             | 0.062                             | 8.976                              | 0.074                             | 8.481                              | 0.042                             | 10.089                             | 0.025                             |
| <b>0.20</b>   | 13.517                             | 0.119                             | 10.986                             | 0.074                             | 10.395                             | 0.082                             | 12.601                             | 0.068                             |
| <b>0.32</b>   | 27.081                             | 0.302                             | 23.009                             | 0.275                             | 18.977                             | 0.199                             | 23.011                             | 0.076                             |
| <b>0.50</b>   | 56.226                             | 0.371                             | 64.337                             | 0.374                             | 53.438                             | 0.122                             | 48.872                             | 0.310                             |
| <b>0.68</b>   | 123.123                            | 1.116                             | 115.068                            | 0.390                             | 101.261                            | 0.421                             | 82.987                             | 0.675                             |
| <b>0.80</b>   | 146.569                            | 0.718                             | 123.827                            | 0.699                             | 113.936                            | 0.313                             | 93.764                             | 0.958                             |
| <b>1.00</b>   | 128.174                            | 0.682                             | 103.813                            | 0.914                             | 92.610                             | 0.938                             | 73.357                             | 0.082                             |

**Table S7.** Characteristics of clusters of developed artificial networks used for Theophylline solubility predictions in neat solvents, binary aqueous mixtures and ternary NADES choline chloride based solvents.

| <b>SANN<br/>code</b> | <b>neurons</b> | <b>outliers</b> | <b>RMSD<br/>·10<sup>3</sup></b> | <b>Error<br/>function</b> | <b>Activation<br/>function</b> | <b>Output<br/>function</b> | <b>Trainig<br/>algorithm</b> |
|----------------------|----------------|-----------------|---------------------------------|---------------------------|--------------------------------|----------------------------|------------------------------|
| SANN1                | 10             | 1               | 29.3                            | SOS                       | Tanh                           | Tanh                       | BFGS 341                     |
| SANN2                | 8              | 2               | 33.3                            | SOS                       | Tanh                           | Linear                     | BFGS 400                     |
| SANN3                | 12             | 1               | 33.6                            | SOS                       | Tanh                           | Linear                     | BFGS 339                     |
| SANN4                | 9              | 3               | 33.8                            | SOS                       | Tanh                           | Tanh                       | BFGS 278                     |
| SANN5                | 11             | 2               | 34.2                            | SOS                       | Tanh                           | Tanh                       | BFGS 364                     |
| SANN6                | 11             | 2               | 34.4                            | SOS                       | Tanh                           | Linear                     | BFGS 228                     |
| SANN7                | 12             | 3               | 34.5                            | SOS                       | Tanh                           | Tanh                       | BFGS 447                     |
| SANN8                | 12             | 2               | 35.1                            | SOS                       | Tanh                           | Linear                     | BFGS 333                     |
| SANN9                | 6              | 2               | 35.2                            | SOS                       | Tanh                           | Linear                     | BFGS 357                     |
| SANN10               | 9              | 3               | 35.4                            | SOS                       | Tanh                           | Linear                     | BFGS 279                     |
| SANN11               | 11             | 2               | 36.9                            | SOS                       | Tanh                           | Tanh                       | BFGS 289                     |
| SANN12               | 10             | 2               | 36.9                            | SOS                       | Tanh                           | Linear                     | BFGS 209                     |
| SANN13               | 9              | 4               | 37.1                            | SOS                       | Logistic                       | Linear                     | BFGS 408                     |
| SANN14               | 12             | 2               | 37.3                            | SOS                       | Tanh                           | Tanh                       | BFGS 227                     |
| SANN15               | 11             | 4               | 37.3                            | SOS                       | Tanh                           | Tanh                       | BFGS 273                     |
| SANN16               | 12             | 4               | 37.5                            | SOS                       | Tanh                           | Tanh                       | BFGS 348                     |
| SANN17               | 12             | 2               | 37.5                            | SOS                       | Tanh                           | Linear                     | BFGS 260                     |
| SANN18               | 8              | 4               | 37.6                            | SOS                       | Tanh                           | Tanh                       | BFGS 314                     |
| SANN19               | 11             | 4               | 37.7                            | SOS                       | Tanh                           | Linear                     | BFGS 281                     |
| SANN20               | 8              | 1               | 37.9                            | SOS                       | Tanh                           | Linear                     | BFGS 226                     |
| SANN21               | 12             | 2               | 37.9                            | SOS                       | Tanh                           | Linear                     | BFGS 217                     |
| SANN22               | 10             | 3               | 38.2                            | SOS                       | Tanh                           | Linear                     | BFGS 181                     |
| SANN23               | 12             | 1               | 38.2                            | SOS                       | Tanh                           | Exponential                | BFGS 309                     |
| SANN24               | 12             | 4               | 38.2                            | SOS                       | Tanh                           | Tanh                       | BFGS 203                     |
| SANN25               | 11             | 2               | 38.3                            | SOS                       | Tanh                           | Linear                     | BFGS 273                     |
| SANN26               | 11             | 4               | 38.5                            | SOS                       | Tanh                           | Tanh                       | BFGS 259                     |
| SANN27               | 9              | 4               | 38.6                            | SOS                       | Logistic                       | Linear                     | BFGS 299                     |
| SANN28               | 6              | 4               | 38.7                            | SOS                       | Logistic                       | Tanh                       | BFGS 338                     |
| SANN29               | 12             | 2               | 38.8                            | SOS                       | Exponential                    | Exponential                | BFGS 293                     |
| SANN30               | 10             | 3               | 38.9                            | SOS                       | Exponential                    | Exponential                | BFGS 278                     |
| SANN31               | 10             | 3               | 39.0                            | SOS                       | Tanh                           | Exponential                | BFGS 410                     |
| SANN32               | 12             | 1               | 39.0                            | SOS                       | Exponential                    | Exponential                | BFGS 374                     |
| SANN33               | 7              | 2               | 39.2                            | SOS                       | Tanh                           | Tanh                       | BFGS 325                     |
| SANN34               | 11             | 1               | 39.3                            | SOS                       | Exponential                    | Exponential                | BFGS 303                     |
| SANN35               | 8              | 3               | 39.6                            | SOS                       | Tanh                           | Tanh                       | BFGS 250                     |
| SANN36               | 11             | 2               | 39.6                            | SOS                       | Exponential                    | Exponential                | BFGS 285                     |
| SANN37               | 12             | 3               | 39.9                            | SOS                       | Exponential                    | Logistic                   | BFGS 311                     |
| SANN38               | 12             | 3               | 39.9                            | SOS                       | Exponential                    | Exponential                | BFGS 295                     |
| SANN39               | 10             | 3               | 39.9                            | SOS                       | Tanh                           | Linear                     | BFGS 268                     |
| SANN40               | 10             | 3               | 40.0                            | SOS                       | Tanh                           | Linear                     | BFGS 240                     |

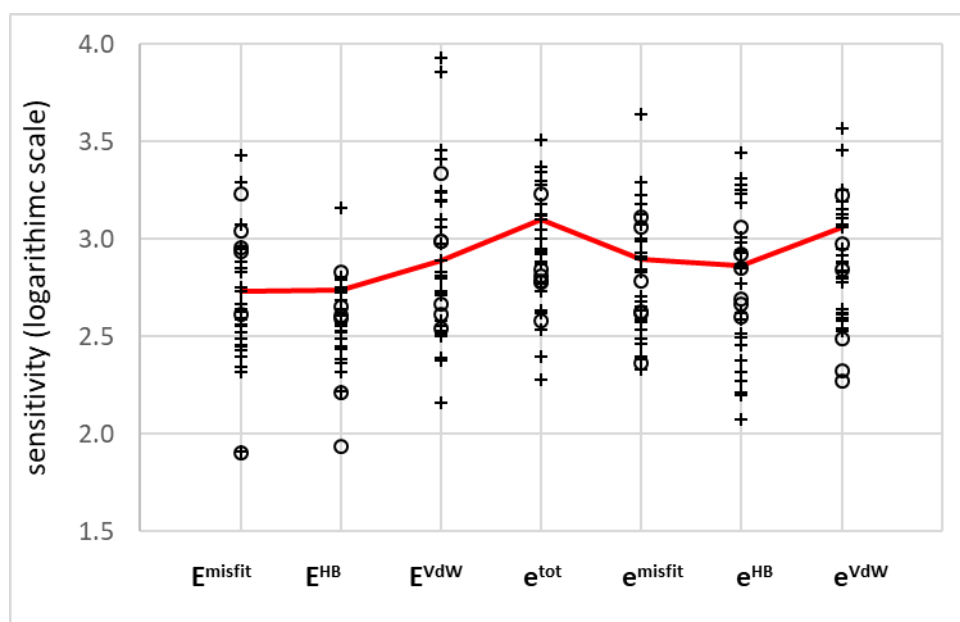

**Figure S1.** The Importance of molecular descriptors in the development of SANNs. Red bold line represents the mean value, while open circles characterize the most efficient network (SANN1).

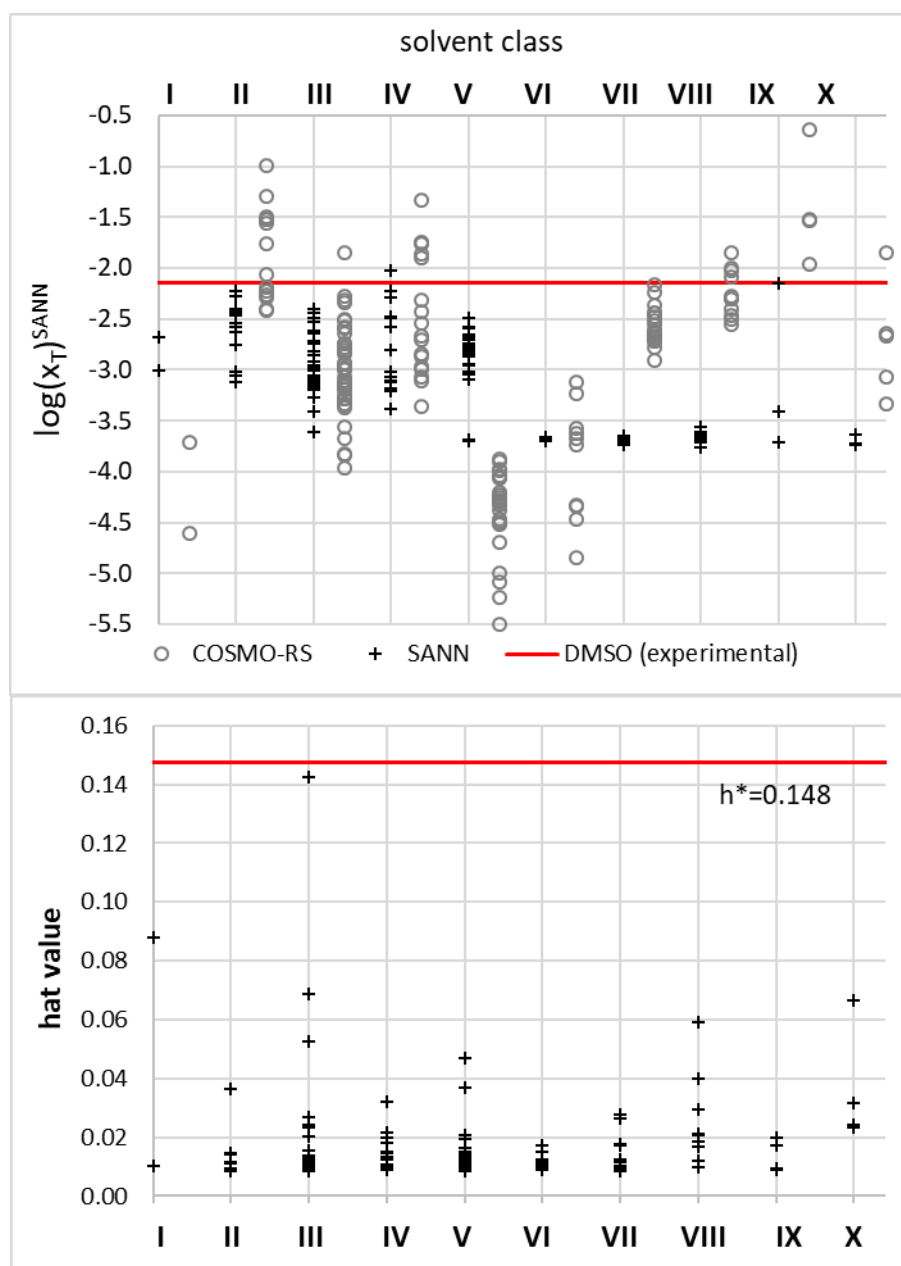

**Figure S2.**(top) The results of screening of Theophylline solubility in neat solvents using the cluster of 30 neural networks. For comparison purposes the experimental solubility in DMSO was provided. The very first point corresponds to predications of the most accurate network SANN1. The neat solvents classification (bottom) Distributions of hat values. The following classes were adopted according to Durand et al [102], namely I-strong electron pair, donor bases; II - weak electron pair, donor bases; III - aprotic dipolar; IV - aprotic highly dipolar; V – apolar; VI – asymmetric halogenated hydrocarbons; VII – amphiprotic; VIII -polar protic; IX - organic acidic compounds; X polar structured

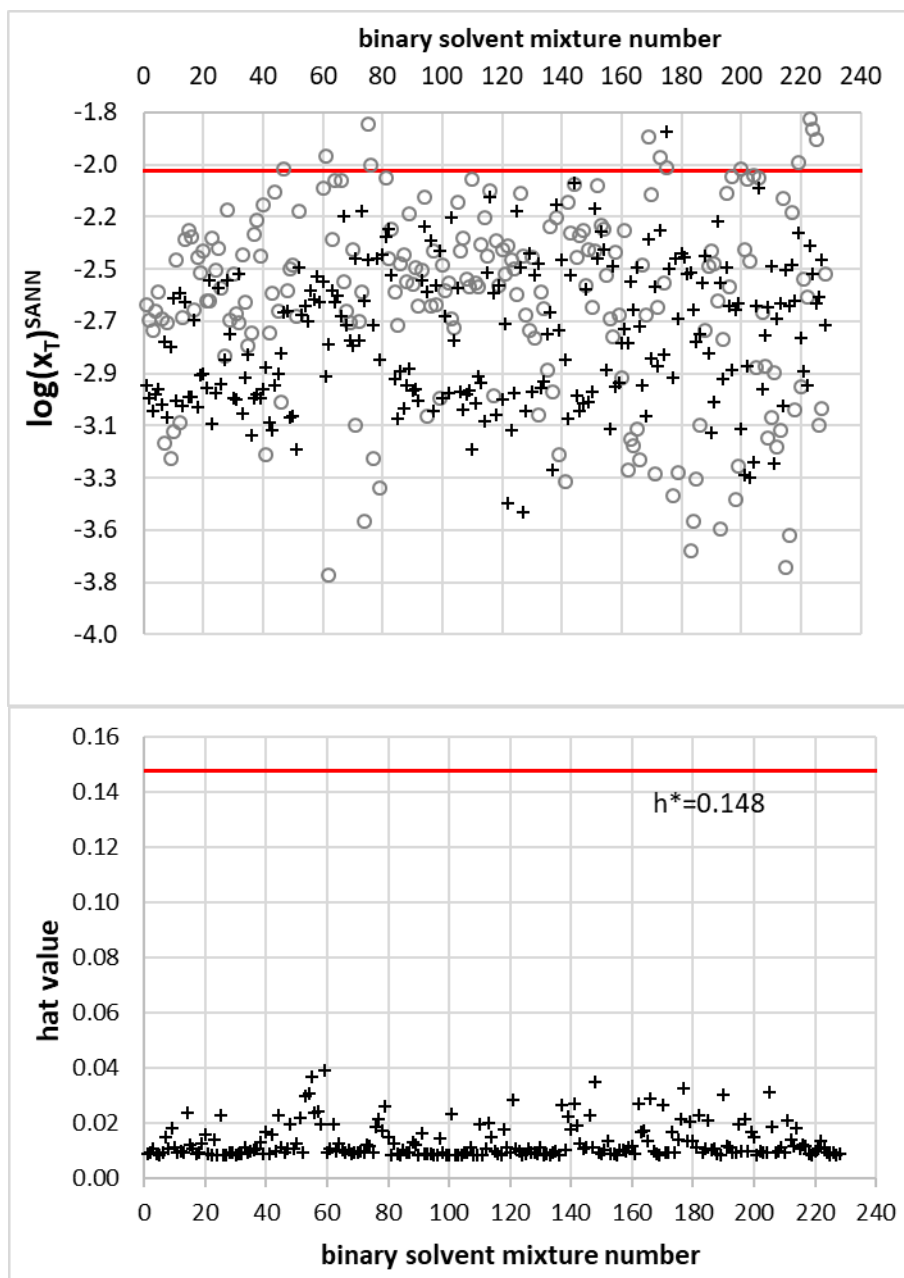

**Figure S3.** (top) The results of screening of Theophylline solubility in 228 binary solvents mixtures using the cluster of 30 neural networks. For comparison purposes the experimental solubility in 1:1 [DMSO+water] solution was provided. Networks are numbered according to decreasing accuracy (RMSD values). (bottom) Distributions of hat values.

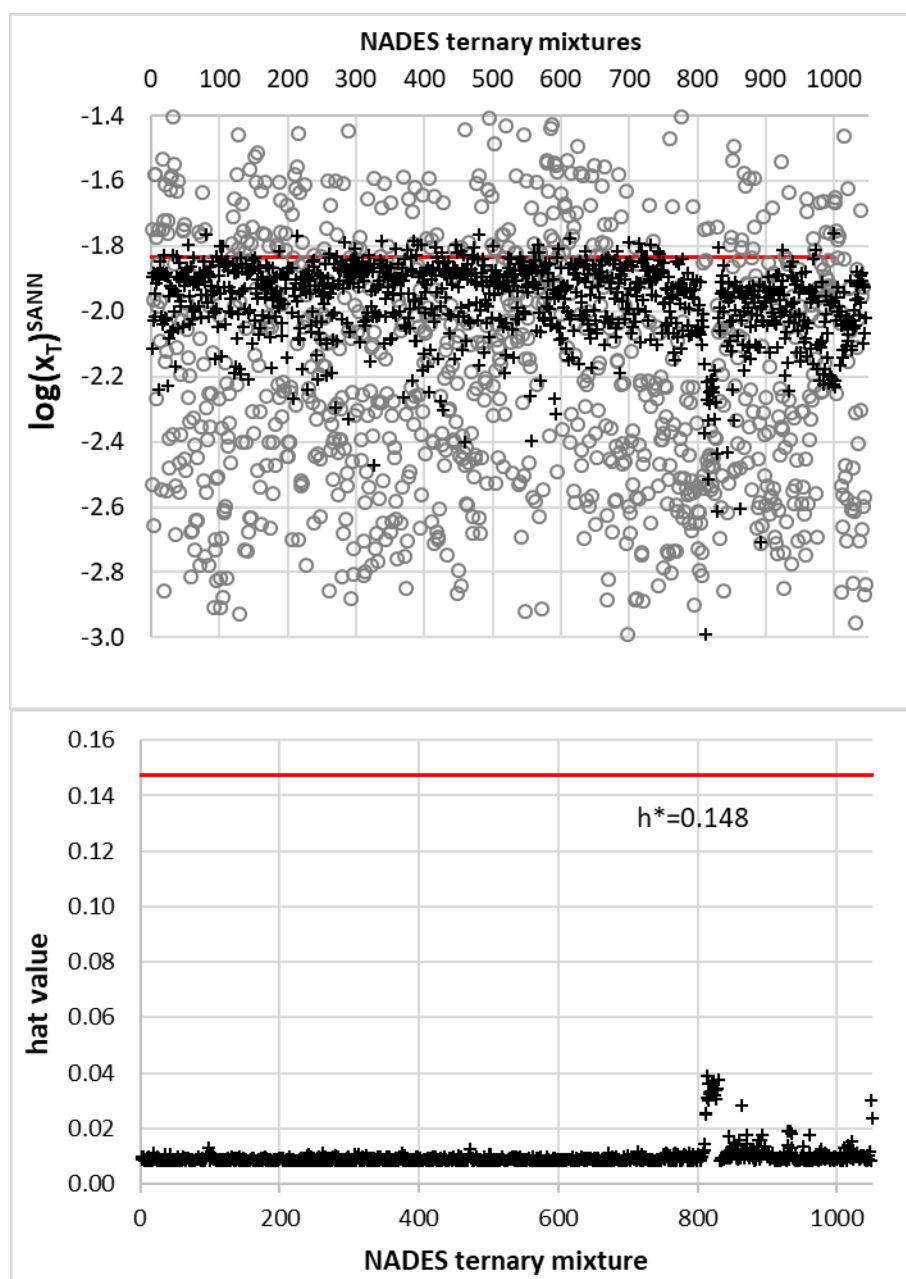

**Figure S4.** (top) The results of screening of Theophylline solubility in aqueous NADES formed by 1050 glycerol replacers in condition mimicking experimental conditions. For comparison purposes the experimental solubility in 0.8:0.2 [ChCl+glycerol]:[water] solution was provided. (bottom) Distributions of hat values.
